# Supplementary material for: Effects of Glyphosate on Female Reproductive Output in the Marine Polychaete Worm Ophryotrocha diadema
Source: MDPI journal article supplement (doi:10.3390/toxics11060501), 2023-06-02
Supplement: s1 [file s1]

# SUPPLEMENTARY MATERIAL:

Table S1. Total number of cocoons, total number of eggs/ cocoon and growth rate of *O. diadema* focals during the 21 days of the experimental period in the Control group A and the Experimental group B.

| Control group A<br>gly = 0.0 µg/mL | N. of cocoons | N. of eggs/cocoon | Growth rate | Exp. group B<br>gly = 0.125 µg/mL | N. of cocoons | N. of eggs/cocoon | Growth rate |
|------------------------------------|---------------|-------------------|-------------|-----------------------------------|---------------|-------------------|-------------|
| 1                                  | 4             | 67                | 3           | 1                                 | 4             | 53                | 2           |
| 2                                  | 5             | 79                | 3           | 2                                 | 4             | 65                | 3           |
| 3                                  | 5             | 101               | 4           | 3                                 | 2             | 34                | 2           |
| 4                                  | 4             | 90                | 4           | 4                                 | 3             | 74                | 0           |
| 5                                  | 4             | 92                | 3           | 5                                 | 0             | 0 focal died      |             |
| 6                                  | 3             | 56                | 4           | 6                                 | 3             | 67                | 0           |
| 7                                  | 4             | 86                | 4           | 7                                 | 0             | 0 focal died      |             |
| 8                                  | 3             | 63                | 4           | 8                                 | 2             | 36                | 1           |
| 9                                  | 1             | 10                | 3           | 9                                 | 4             | 75                | 3           |
| 10                                 | 3             | 39                | 4           | 10                                | 0             | 0 focal died      |             |
| 11                                 | 3             | 61                | 4           | 11                                | 4             | 76                | 2           |
| 12                                 | 4             | 69                | 4           | 12                                | 3             | 60                | 3           |
| 13                                 | 4             | 93                | 3           | 13                                | 4             | 45                | 1           |
| 14                                 | 4             | 66                | 4           | 14                                | 4             | 67                | 3           |
| 15                                 | 4             | 67                | 4           | 15                                | 3             | 58                | 0           |
| 16                                 | 4             | 59                | 3           | 16                                | 3             | 46                | 2           |
| 17                                 | 4             | 75                | 4           | 17                                | 4             | 79                | 3           |
| 18                                 | 4             | 74                | 5           | 18                                | 3             | 51                | 4           |
| 19                                 | 2             | 20                | 3           | 19                                | 4             | 91                | 2           |
| 20                                 | 5             | 101               | 4           | 20                                | 3             | 63                | 4           |
| 21                                 | 3             | 45                | 5           | 21                                | 3             | 34                | 3           |
| 22                                 | 4             | 59                | 1           | 22                                | 5             | 77                | 1           |
| 23                                 | 4             | 80                | 4           | 23                                | 1             | 9                 | 2           |
| 24                                 | 4             | 88                | 7           | 24                                | 2             | 24                | 2           |

Table S2. Total number of cocoons, total number of eggs/ cocoon and growth rate of *O. diadema* focals during the 21 days of the experimental period in the Experimental groups D, C and E.

| Exp. group C<br>gly = 0.250 µg/mL | N. of cocoons | N. of eggs/cocoon | Growth rate | Exp. group D<br>gly = 0.500 µg/mL | N. of cocoons | N. of eggs/cocoon | Growth rate | Exp. group E<br>gly = 1.000 µg/mL | N. of cocoons | N. of eggs/cocoon | Growth rate |
|-----------------------------------|---------------|-------------------|-------------|-----------------------------------|---------------|-------------------|-------------|-----------------------------------|---------------|-------------------|-------------|
| 1                                 | 0             | 0                 | focal died  | 1                                 | 0             | 0                 | focal died  | 1                                 | 0             | 0                 | focal died  |
| 2                                 | 0             | 0                 | focal died  | 2                                 | 0             | 0                 | focal died  | 2                                 | 0             | 0                 | focal died  |
| 3                                 | 0             | 0                 | focal died  | 3                                 | 0             | 0                 | focal died  | 3                                 | 0             | 0                 | focal died  |
| 4                                 | 0             | 0                 | focal died  | 4                                 | 0             | 0                 | focal died  | 4                                 | 0             | 0                 | focal died  |
| 5                                 | 0             | 0                 | focal died  | 5                                 | 0             | 0                 | focal died  | 5                                 | 0             | 0                 | focal died  |
| 6                                 | 0             | 0                 | focal died  | 6                                 | 0             | 0                 | focal died  | 6                                 | 0             | 0                 | focal died  |
| 7                                 | 0             | 0                 | focal died  | 7                                 | 0             | 0                 | focal died  | 7                                 | 0             | 0                 | focal died  |
| 8                                 | 0             | 0                 | focal died  | 8                                 | 0             | 0                 | focal died  | 8                                 | 0             | 0                 | focal died  |
| 9                                 | 0             | 0                 | focal died  | 9                                 | 0             | 0                 | focal died  | 9                                 | 0             | 0                 | focal died  |
| 10                                | 0             | 0                 | focal died  | 10                                | 0             | 0                 | focal died  | 10                                | 0             | 0                 | focal died  |
| 11                                | 0             | 0                 | focal died  | 11                                | 0             | 0                 | focal died  | 11                                | 0             | 0                 | focal died  |
| 12                                | 0             | 0                 | focal died  | 12                                | 0             | 0                 | focal died  | 12                                | 0             | 0                 | focal died  |
| 13                                | 0             | 0                 | focal died  | 13                                | 0             | 0                 | focal died  | 13                                | 0             | 0                 | focal died  |
| 14                                | 3             | 59                | 1           | 14                                | 0             | 0                 | focal died  | 14                                | 0             | 0                 | focal died  |
| 15                                | 0             | 0                 | focal died  | 15                                | 0             | 0                 | focal died  | 15                                | 0             | 0                 | focal died  |
| 16                                | 0             | 0                 | focal died  | 16                                | 0             | 0                 | focal died  | 16                                | 0             | 0                 | focal died  |
| 17                                | 0             | 0                 | focal died  | 17                                | 0             | 0                 | focal died  | 17                                | 0             | 0                 | focal died  |
| 18                                | 0             | 0                 | focal died  | 18                                | 0             | 0                 | focal died  | 18                                | 0             | 0                 | focal died  |
| 19                                | 0             | 0                 | focal died  | 19                                | 0             | 0                 | focal died  | 19                                | 0             | 0                 | focal died  |
| 20                                | 0             | 0                 | focal died  | 20                                | 0             | 0                 | focal died  | 20                                | 0             | 0                 | focal died  |
| 21                                | 0             | 0                 | focal died  | 21                                | 0             | 0                 | focal died  | 21                                | 0             | 0                 | focal died  |
| 22                                | 4             | 80                | 2           | 22                                | 0             | 0                 | focal died  | 22                                | 0             | 0                 | focal died  |
| 23                                | 0             | 0                 | focal died  | 23                                | 0             | 0                 | focal died  | 23                                | 0             | 0                 | focal died  |
| 24                                | 0             | 0                 | focal died  | 24                                | 0             | 0                 | focal died  | 24                                | 0             | 0                 | focal died  |
